# Supplementary material for: Predicting hospital and emergency department utilization among community-dwelling older adults: Statistical and machine learning approaches
Source: PLoS One. 2018 Nov 1;13(11):e0206662. doi: 10.1371/journal.pone.0206662 (PMC6211724; doi:10.1371/journal.pone.0206662)
Supplement: S3 Table — (CSV) [file pone.0206662.s003.csv]

List of predictors by descending importance
6-month retrospective hospitalizations (admin data)
6-month retrospective ED visits (admin data)
DIVERT Scale
Retrospective hospital admits (assessment)
Appropriate Medications CAP
CHESS Scale
Shortness of breath
Health Services: Visit nursing (days)
Pressure ulcer risk scale
Cardiorespiratory CAP
Health Services: Visit nursing (hours)
Congestive heart failure
Treatments: Nursing monitoring less than daily
Overall change in care needs
Dressings
COPD
Cancer
Loss of appetite
Any troubling skin conditions
Retrospective ED visits (assessment)
Hours of physical exercise in last 3 days
Self-reported poor health
ADL Decline
Sex
Treatments: Oxygen
Number of medications
ADL CAP
Edema
Renal failure
Diabetes
Number of days went outside
Hearing
Home care needs
CRISIS Scale
Mobility device (indoors)
Falls (last 90 days)
Neglected, abused or mistreated
Bowel Incontinence
Mobility device (outdoors)
Treatments: Medication by injection
Management of oxygen
Instrumental Activities of Daily Living CAP
Age
Unsteady gait
Stair Climbing
Fear of falling
Caregiver expresses feelings of distress, anger, or depression
RUGS-III HC Categories
IADL: Meal preparation (difficulty)
IADL Difficulty scale
IADL: Meal preparation (performance)
Change in social activities
RUGS-III / HC
ADL: Dressing lower body
Stasis ulcer
Skin tears or cuts
Bowel Conditions CAP
Personal Support Algorithm group
History of pressure ulcers
Coronary artery disease
Treatments: Skin treatment
Institutional Risk CAP
Dysthymia
IADL: Housework (difficulty)
ADL: Bathing
IADL: Housework (performance)
IADL: Transportation (performance)
Unintended weight loss
Dizziness
Sadness
Treatments: Special diet
ADL Long Form
Treatments: Medication by injection
Depression Rating Scale
Client believes he/she is capable of increased functional independence
Expression
Treatments: Exercise therapy
Health Services: Occupational therapy (hours)
Client or caregiver believes client would be better off elsewhere
ADL: Locomotion in home
Cognitive Performance Scale
Treatments: Daily nurse monitoring
Unexplained injuries
Health Services: Occupational therapy (days)
Management of IV
Adherence with medications
Character of pain
Informal helper assists with ADLs
Cognitive skills for daily decision-making
ADL: Locomotion outside of home
Dementia
Urinary Incontinence CAP
IADL Involvement scale
Use of pads or briefs to protect against wetness
6-month retrospective ED visits with injurious fall (admin data)
Peripheral vascular disease
Diarrhea
Treatments: Day centre
Marital Status
Comprehension
Procedural Memory
Physical Activity CAP
Good prospects of recovery from current disease or conditions
Decline in mood indicators
Bladder Incontinence
One or fewer meal per day
Treatments: Dialysis
IADL: Phone use (difficulty)
Treatments: IV - central
IADL: Transportation (difficulty)
Intensity of pain
Change in mental function (Last 7 Days)
Cognitive Loss CAP
Sad, pained, or worried facial expressions
ADL: Toilet Use
IADL: Managing medications (difficulty)
ADL: Dressing upper body
Relationship to informal helper
IADL: Shopping (performance)
Pneumonia
